# Supplementary material for: Phosphatidylinositol 5 Phosphate 4-Kinase Regulates Plasma-Membrane PIP3 Turnover and Insulin Signaling
Source: PubMed Central journal article supplement — Cell Rep. Author manuscript; Available in PMC 2019 Jun 24. (PMC6591132; doi:10.1016/j.celrep.2019.04.084), 2019-05-14
Supplement: EMS83416-supplement-Document_S1.pdf [file EMS83416-supplement-Document_S1.pdf]

**Cell Reports, Volume 27**

**Supplemental Information**

**Phosphatidylinositol 5 Phosphate 4-Kinase**

**Regulates Plasma-Membrane PIP<sub>3</sub>**

**Turnover and Insulin Signaling**

**Sanjeev Sharma, Swarna Mathre, Visvanathan Ramya, Dhananjay Shinde, and Padinjat Raghu**

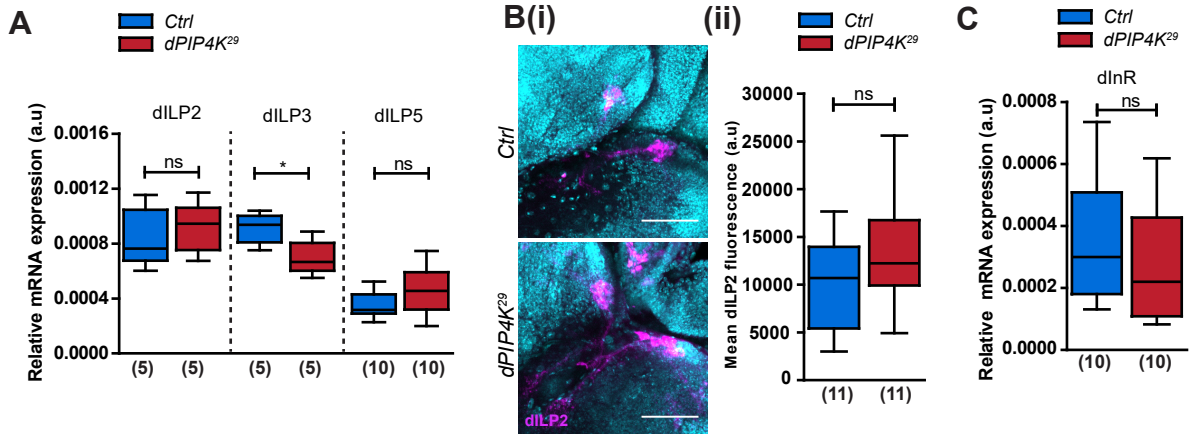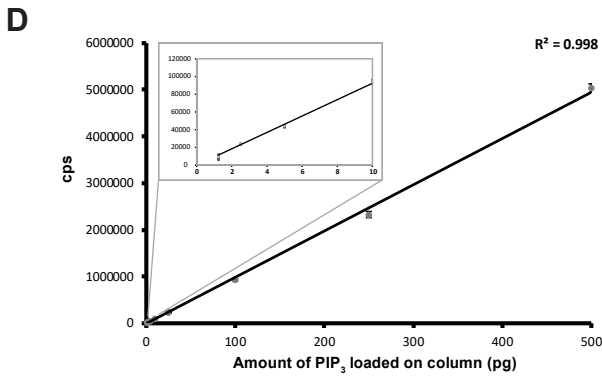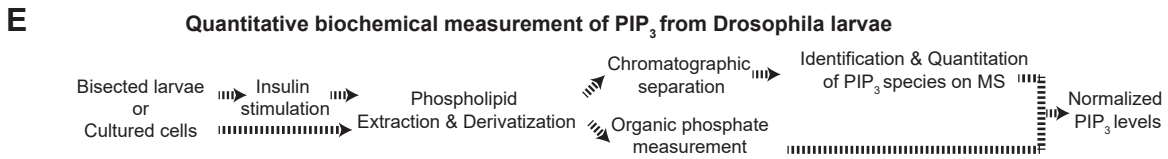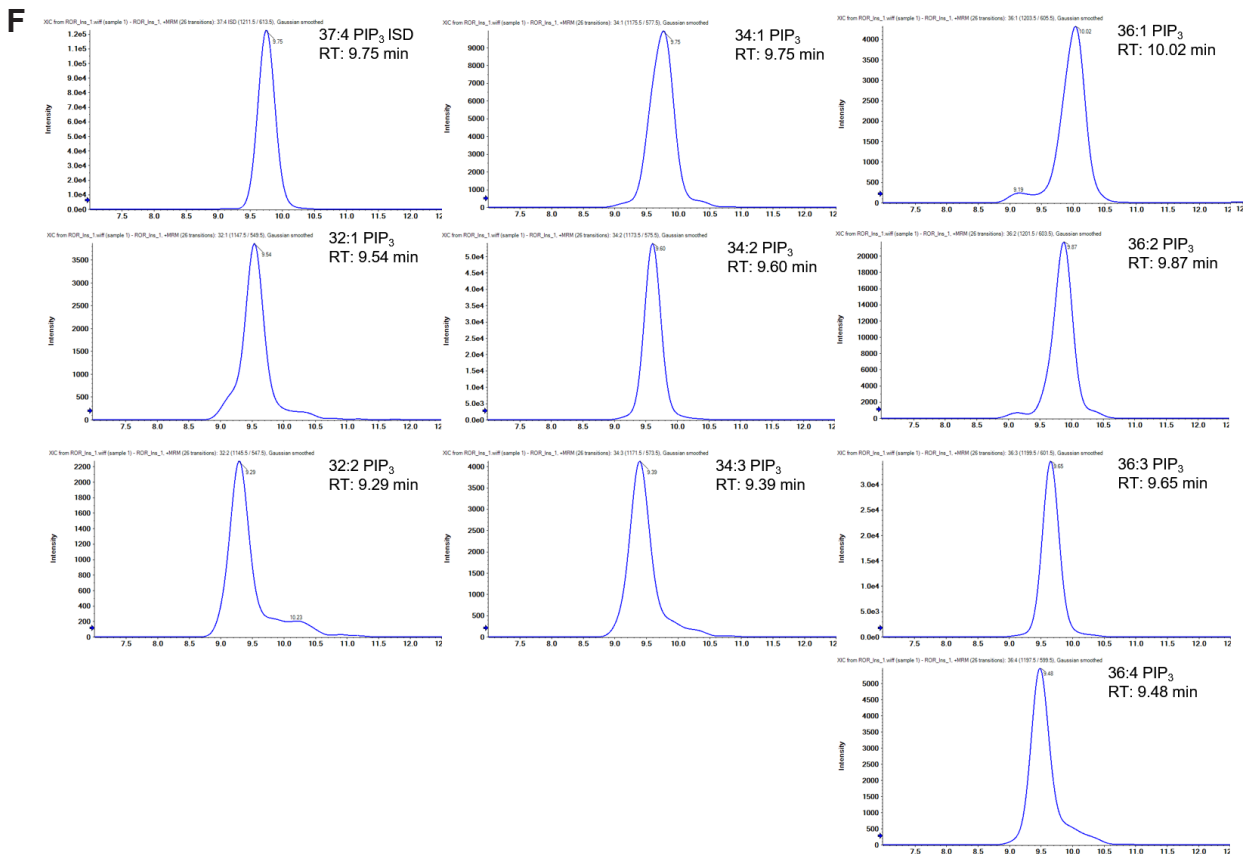

**Figure S1. Status of humoral signals in *dPIP4K*<sup>29</sup> larvae and LCMS method for PIP<sub>3</sub> measurement (Related to Figure 1 and STAR Methods)**

**A.** qPCR measurements for mRNA levels of *dILP 2, 3* and *5* from whole larvae. **B(i, ii).** Confocal z-projections for dILP2 immunostaining in larval IPCs and quantification of dILP2 staining intensity in the third instar wandering larval brains; Scale: 50  $\mu$ m. **C.** qPCR measurements for *dInR*. Transcript levels for each gene were normalized to the mRNA levels of *rp49* in the same sample. For A-C, Mann-Whitney test used for statistical analysis; \**p* - value <0.05. **D.** Linearity of mass spectrometer response for increasing amounts of PIP<sub>3</sub> standard (17:0, 20:4) injected. Each point on the curve indicates the mean  $\pm$  SD of three replicate injections. **E(i).** Steps involved in extraction, separation and detection of PIP<sub>3</sub> from larvae. **E(ii).** Chromatograms showing the elution profiles and retention times for various PIP<sub>3</sub> species detected from whole larval lipid extracts of wildtype (*ROR*) larvae stimulated *ex vivo* with 100  $\mu$ M insulin for 10 min. Note the changing retention times with increase in no. of double bonds and increase in length of acyl chains. Increase in double bonds for a fixed acyl chain length results in earlier elution. Increase in length of acyl chain delays elution. Genotypes: A, C. *tGPH/tGPH* and *tGPH/tGPH*; *dPIP4K*<sup>29</sup>. B. *ROR* and *dPIP4K*<sup>29</sup>.

**A(i)**

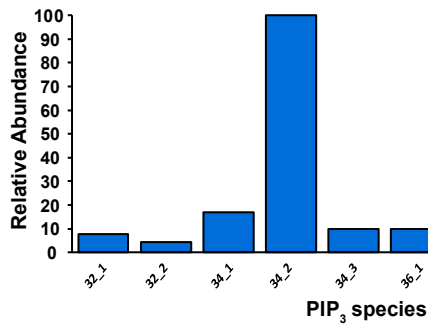

**(ii)**

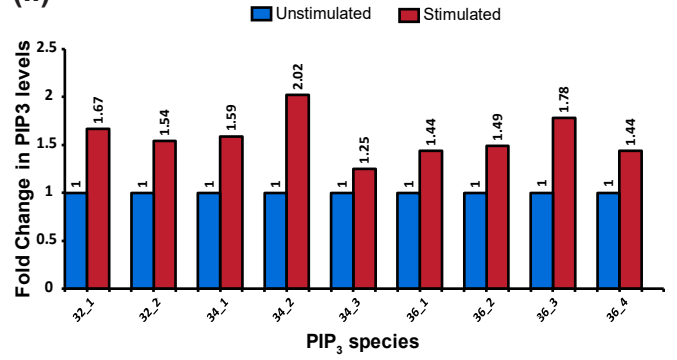

**B**

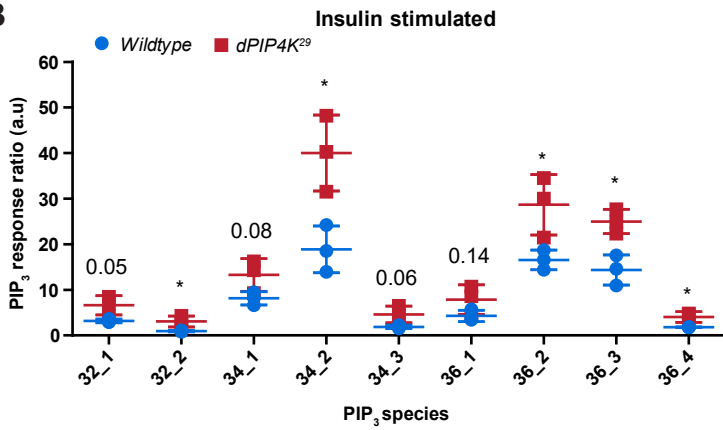

**C**

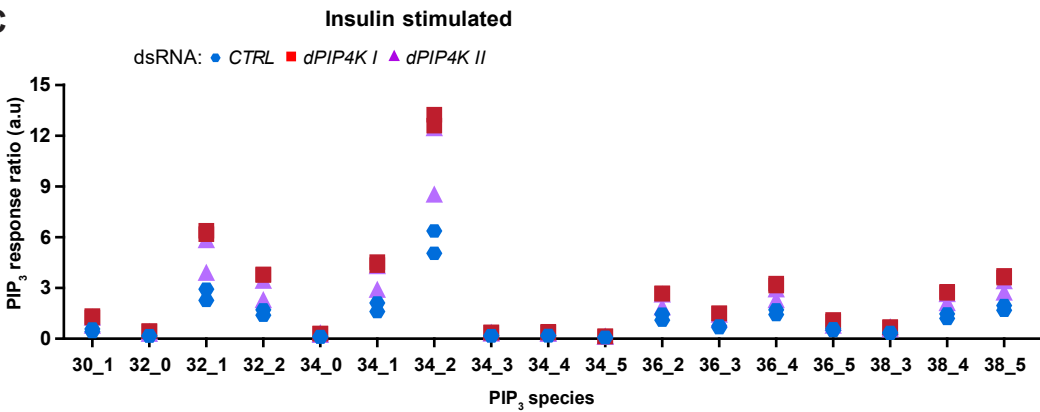

**D**

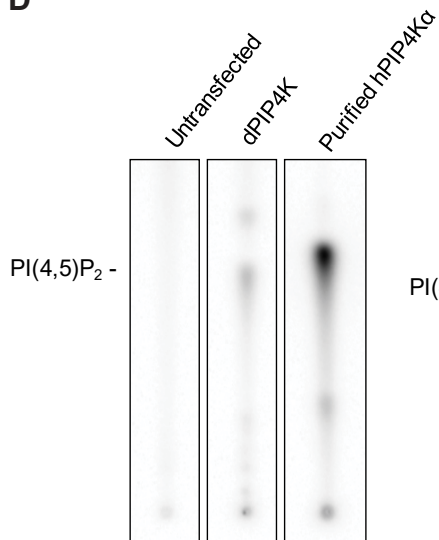

**E**

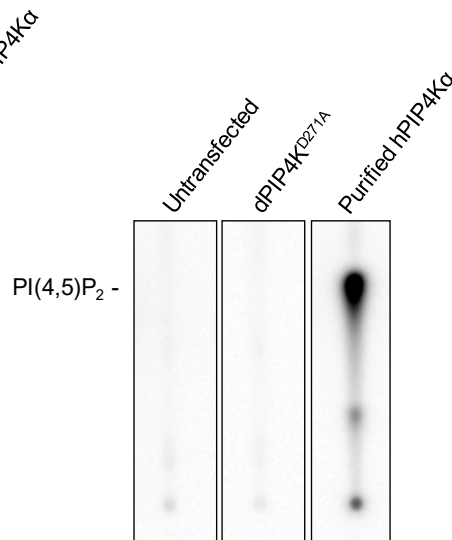

**F**

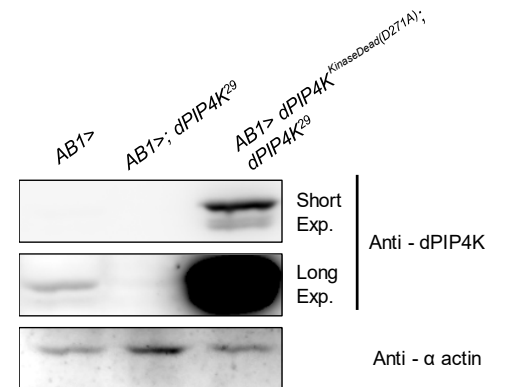

**Figure S2. Mass spectrometry to measure PIP<sub>3</sub> levels and generation of kinase-dead dPIP4K (Related to Figure 1, 2 and STAR Methods)**

**A(i).** Relative abundance of various PIP<sub>3</sub> species in whole larval lipid extracts of wildtype larvae stimulated *ex vivo* with 100 μM insulin for 10 min. **A(ii).** An experiment showing changes in the levels of various larval PIP<sub>3</sub> species upon insulin stimulation (100 μM, 10 min). **B.** Levels of various PIP<sub>3</sub> species in insulin-stimulated *wildtype* (*ROR*) and *dPIP4K*<sup>29</sup> whole larval lipid extracts determined using LCMS. Student's t-test used for statistical comparison between same species across genotypes; \* *p* - value <0.05. **C.** Levels of various PIP<sub>3</sub> species in lipid extracts from insulin-stimulated S2R+ cells with or without knockdown of dPIP4K determined using LCMS. The graphs show mean PIP<sub>3</sub> levels (normalized to spiked internal standards and total lipid phosphates recovered). Error bars depict SD. Representative thin layer chromatographs from PI5P-4-kinase activity assays showing - **D.** presence of activity in wildtype dPIP4K expressing lysates and **E.** no activity in dPIP4K<sup>D271A</sup> expressing lysates. Bacterially expressed and purified PIP4K $\alpha$  was used as a positive control. **F.** Immunoblots from 3<sup>rd</sup> instar larval salivary glands showing levels of dPIP4K<sup>KinaseDead</sup> upon reconstitution. On each panel, numbers inside the parentheses indicate the no. of biological replicates used for the measurement.

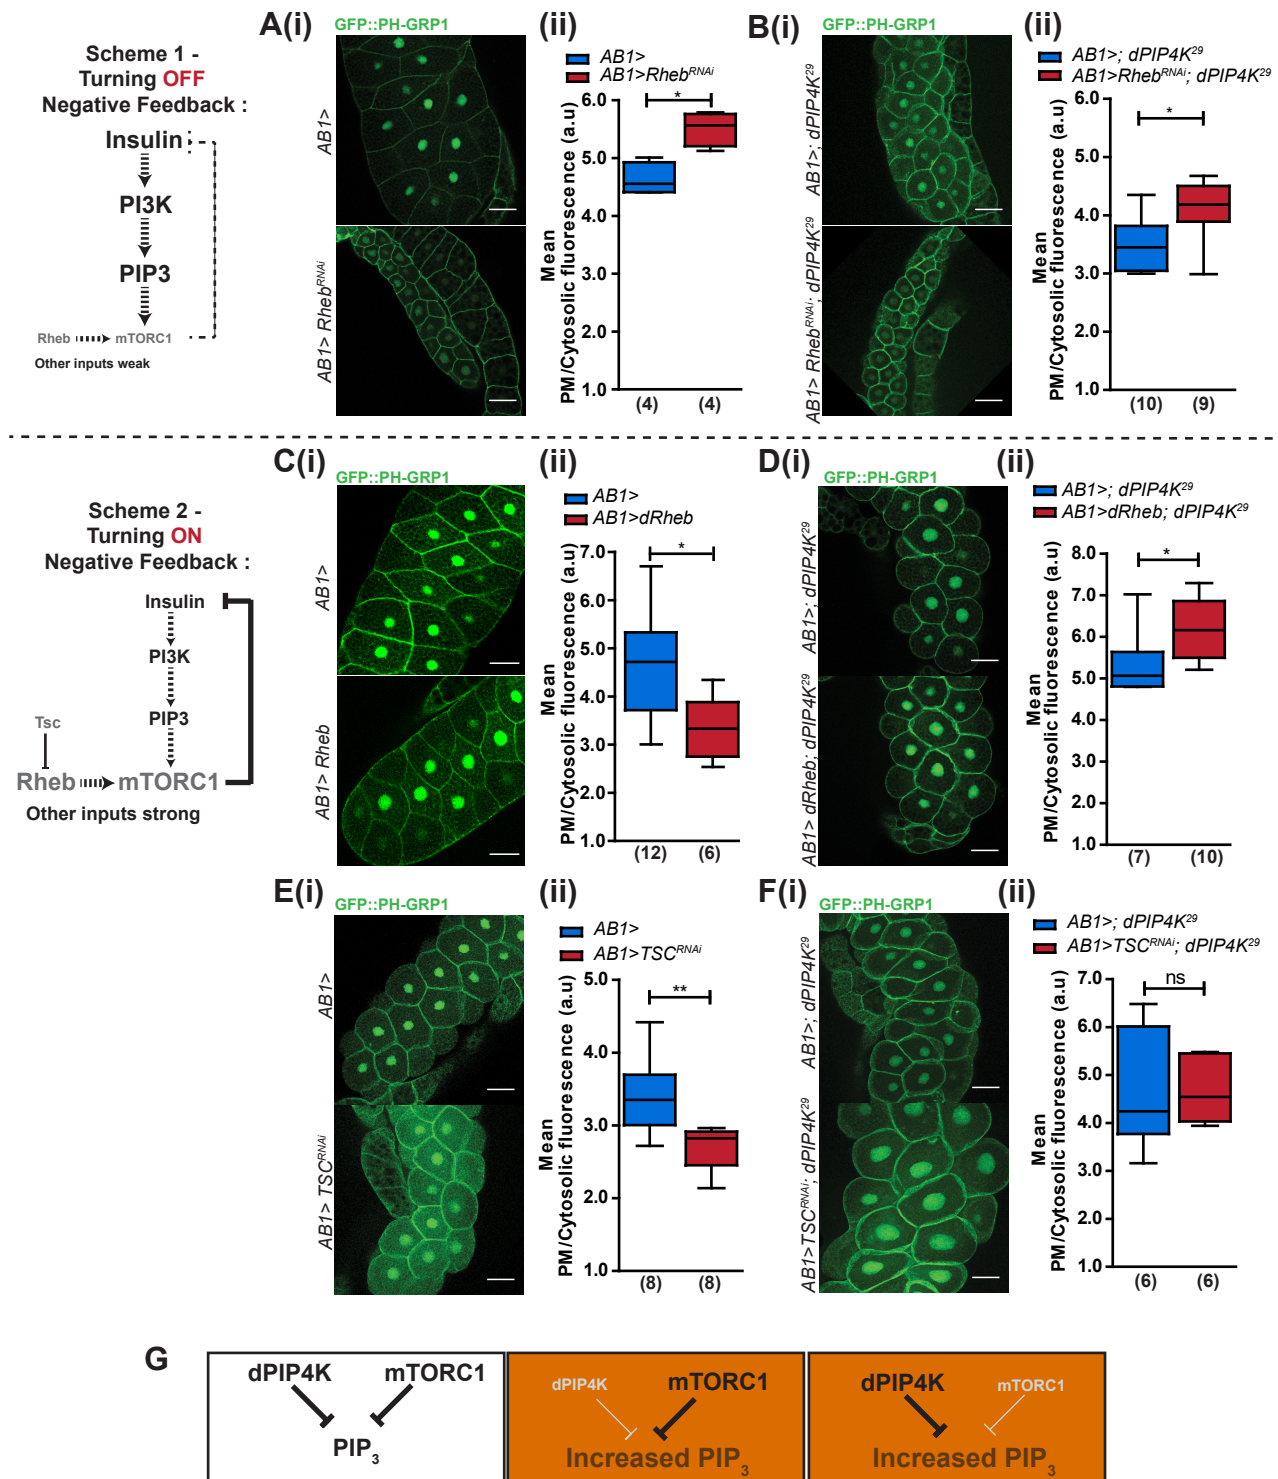

**Figure S3. dPIP4K and TORC1-mediated negative feedback independently regulate plasma-membrane PIP<sub>3</sub> (Related to Figure 3)**

Scheme 1 and 2 depict the feedback regulation of insulin signalling by TORC1 activity in **OFF** and **ON** state respectively. The font and arrow sizes are indicative of the extent of molecular activity. **A-F**. PIP<sub>3</sub> quantification – Salivary gland images showing the distribution of the PIP<sub>3</sub> binding probe GFP-PH-GRP1 in cells. The distribution was quantified as the ratio of probe fluorescence on the plasma membrane to that in the cytosol. In all these experiments, the genetic manipulation was restricted to the salivary glands using *AB1Gal4*. **A, C, E**. In a wildtype background, **A(i, ii)**, downregulation of TOR signalling by RNAi for *Rheb*; **C(i, ii)**, upregulation of TOR signalling through overexpression of *Rheb* and **E(i, ii)**, downregulation of TSC. **B, D, F**. In *dPIP4K<sup>29</sup>* background, **B(i, ii)**, downregulation of TOR signalling by RNAi for *Rheb*; **D(i, ii)**, upregulation of TOR signalling through overexpression of *Rheb* and **F(i, ii)**, downregulation of TSC. Scale: 50  $\mu$ m. **G**. Schematic

showing basal PIP<sub>3</sub> levels is subject to dual negative regulation by dPIP4K and TORC1 output. Decreasing TOR activity weakens negative feedback thereby increasing plasma membrane PIP<sub>3</sub> levels in both *wildtype* and *dPIP4K<sup>29</sup>*. Increasing TOR activity engages the negative feedback loop and brings down PIP<sub>3</sub> levels in wildtype cells but is ineffective and cannot do so in the absence of dPIP4K. Thus, conditions that either reduce dPIP4K levels or TORC1 activity both lead to a dysregulated increase in PIP<sub>3</sub> levels. Whiskers in the box plots represent minimum and maximum values, with a line at the median. Numbers inside the parentheses below the plots indicate the no. of biological replicates used for the measurement. Mann Whitney test used for statistical analysis of the distributions. \**p-value* < 0.05. \*\**p-value* < 0.01. Genotypes: A. *AB1Gal4, tGPH/+* and *AB1Gal4, tGPH/ UAS-Rheb<sup>RNAi</sup>*. B. *AB1Gal4, tGPH/+; dPIP4K<sup>29</sup>* and *AB1Gal4, tGPH/ UAS-Rheb<sup>RNAi</sup>; dPIP4K<sup>29</sup>*. C. *AB1Gal4, tGPH/+* and *UAS-dRheb/+; AB1Gal4, tGPH/+*. D. *AB1Gal4, tGPH/+; dPIP4K<sup>29</sup>* and *UAS-dRheb/+; AB1Gal4, tGPH/+; dPIP4K<sup>29</sup>*. E. *AB1Gal4, tGPH/ UAS-TSC<sup>RNAi</sup>*. F. *AB1Gal4, tGPH/ UAS-TSC<sup>RNAi</sup>; dPIP4K<sup>29</sup>*.

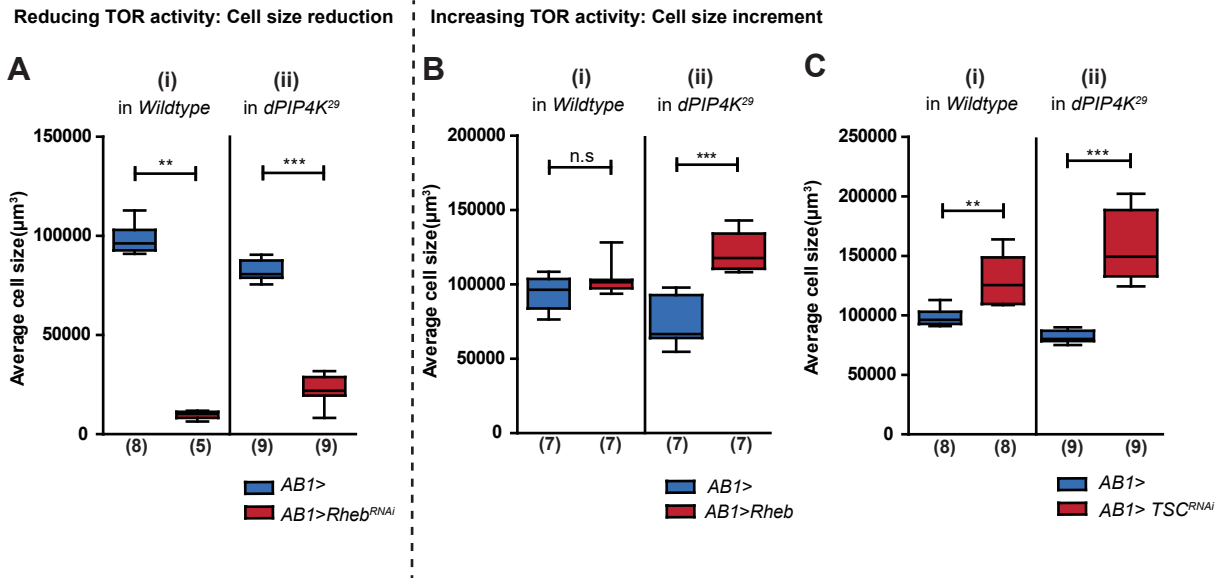

**Figure S4. Changes in TORC1 activity mediate changes in the size of larval salivary gland cells (Related to Figure 3)**

Cell size measurements in salivary glands upon **A.** knockdown of Rheb, **B.** overexpression of dRheb, **C.** knockdown of TSC, in *wildtype* and *dPIP4K<sup>29</sup>* backgrounds. Whiskers in the box plots represent minimum and maximum values, with a line at the median. Numbers inside the parentheses below the plots indicate the no. of biological replicates used for the measurement. Mann Whitney test used for statistical analysis of the distributions. \*\**p*-value <0.01, \*\*\**p*-value <0.001. Genotypes: A(i). *AB1Gal4/+* and *AB1Gal4/UAS-Rheb<sup>RNAi</sup>* and (ii). *AB1Gal4/+; dPIP4K<sup>29</sup>* and *AB1Gal4/UAS-Rheb<sup>RNAi</sup>; dPIP4K<sup>29</sup>* B(i). *AB1Gal4/+* and *UAS-dRheb/+*; *AB1Gal4/+* and (ii). *AB1Gal4/+; dPIP4K<sup>29</sup>* and *UAS-dRheb/+*; *AB1Gal4/+; dPIP4K<sup>29</sup>*. C(i). *AB1Gal4/+* and *UAS-Tsc1<sup>RNAi</sup>/+*; *AB1Gal4/+*. C(ii). *AB1Gal4/+; dPIP4K<sup>29</sup>* and *UAS-Tsc1<sup>RNAi</sup>/+*; *AB1Gal4/+; dPIP4K<sup>29</sup>*. Controls for A(ii) and C(ii) represent values from the same dataset.



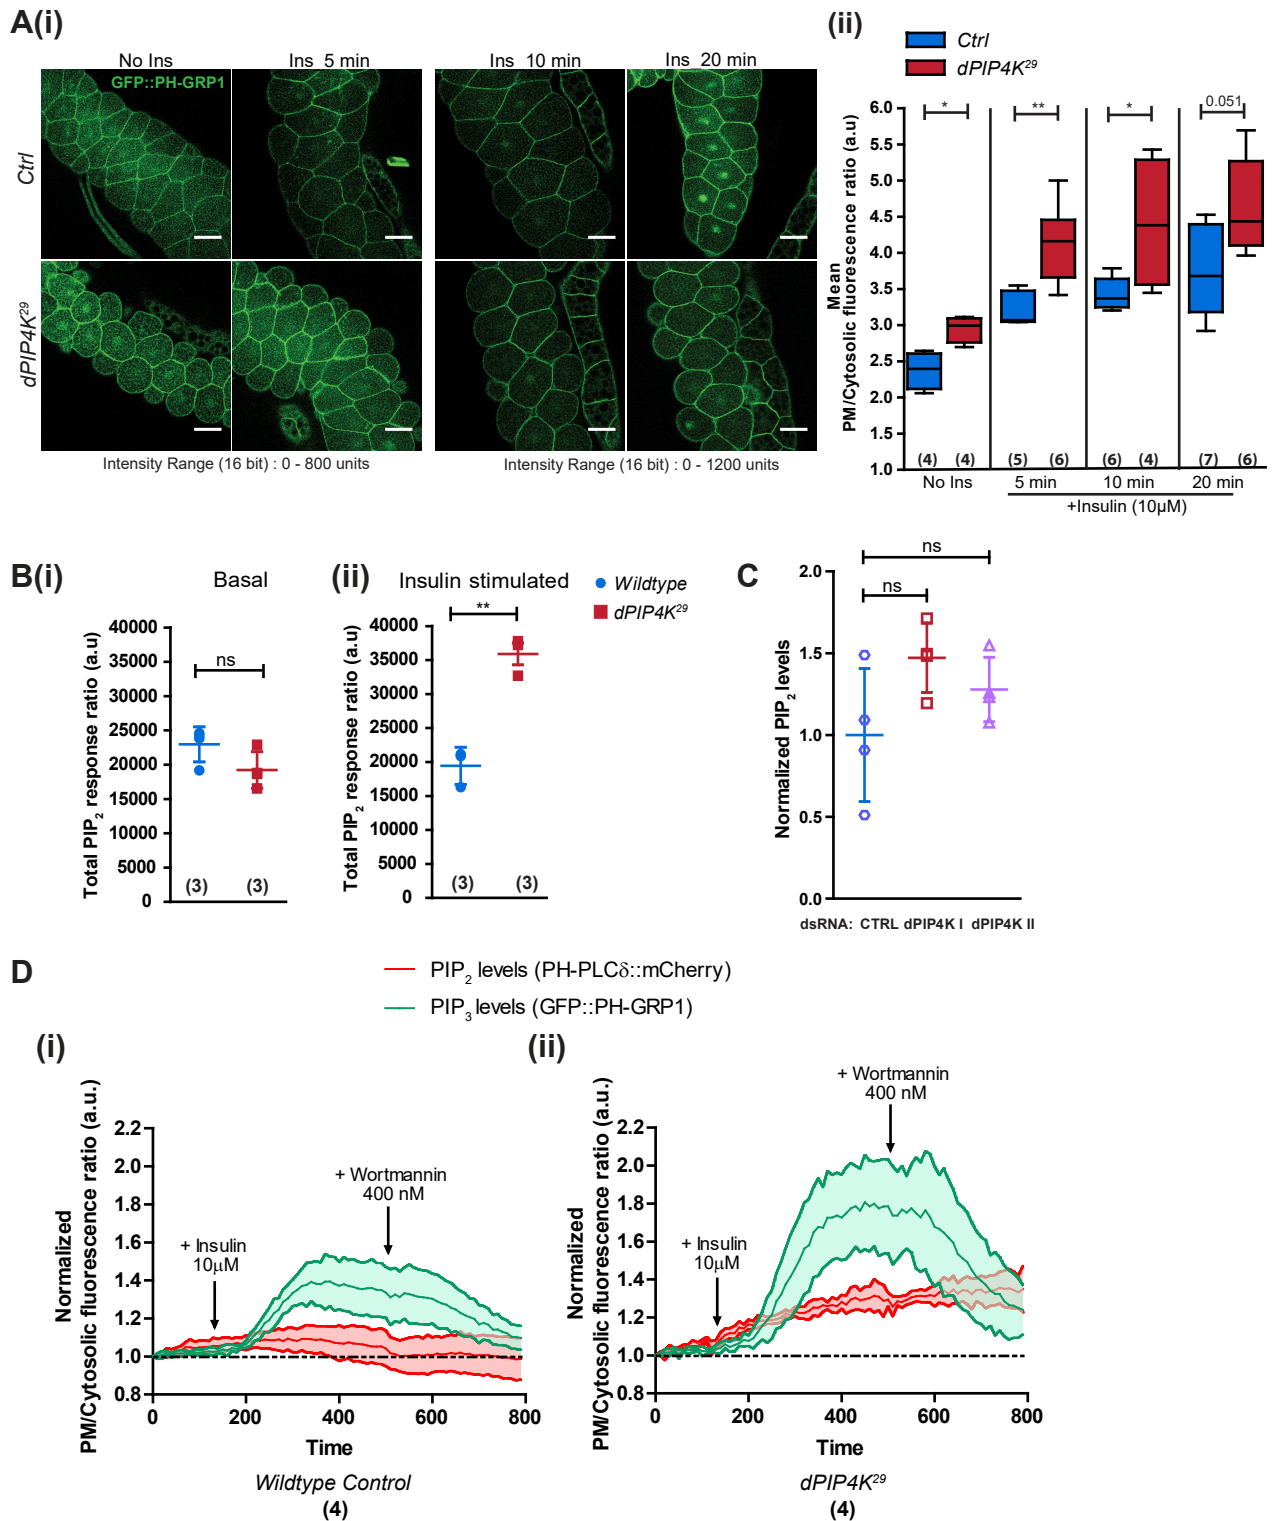

**Figure S5. PIP<sub>2</sub> and PIP<sub>3</sub> measurements in *Drosophila* cells (Related to Figure 4)**

**A(i).** Confocal z-projections of salivary glands expressing GFP-PH-GRP1 in wildtype and *dPIP4K<sup>29</sup>* backgrounds. Salivary glands dissected from wandering 3 rd instar larvae were stimulated or not with 10  $\mu$ M bovine insulin for indicated times, fixed and imaged. **(ii).** Relative PIP<sub>3</sub> levels were measured as a ratio of mean fluorescence intensity at the plasma membrane to that in the cytosol. **B.** Measurement of total PIP<sub>2</sub> levels in lipid extracts using LCMS. **(i).** basal PIP<sub>2</sub> levels **(ii).** insulin-stimulated PIP<sub>2</sub> levels from wildtype (*ROR*) and *dPIP4K<sup>29</sup>*. **C.** insulin-stimulated PIP<sub>2</sub> levels from control and PIP4K knockdown cells. **D.** Live imaging traces from salivary glands expressing both PIP<sub>2</sub> and PIP<sub>3</sub> binding probes **(i).** in wildtype controls **(ii).** in *dPIP4K<sup>29</sup>* larvae. On each panel, numbers inside the parentheses indicate the no. of biological replicates used for the

measurement. For A, Mann Whitney test used for statistical analysis of the distributions. \**p-value* <0.05, \*\**p-value* <0.01. Student's unpaired t-test used for statistical analysis of the distributions in B. \*\**p-value* <0.01. Error bars depict SD. One-way ANOVA with posthoc Tukey's pairwise comparison used for statistical analysis in C. Genotypes: A. *AB1Gal4, tGPH/+* and *AB1Gal4, tGPH /+; dPIP4K<sup>29</sup>*. B. *wildtype (ROR)* and *dPIP4K<sup>29</sup>*. D. *AB1Gal4, tGPH/UAS-PH-PLC::mCherry* and *AB1Gal4, tGPH/UAS-PH-PLC::mCherry; dPIP4K<sup>29</sup>*.

**A Assay for insulin resistance: Larval growth on normal vs. high sugar diet.**

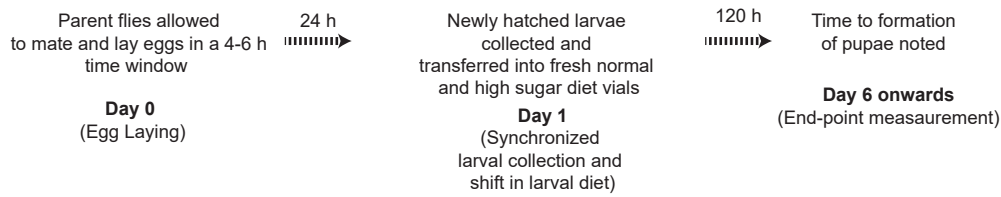

**B**

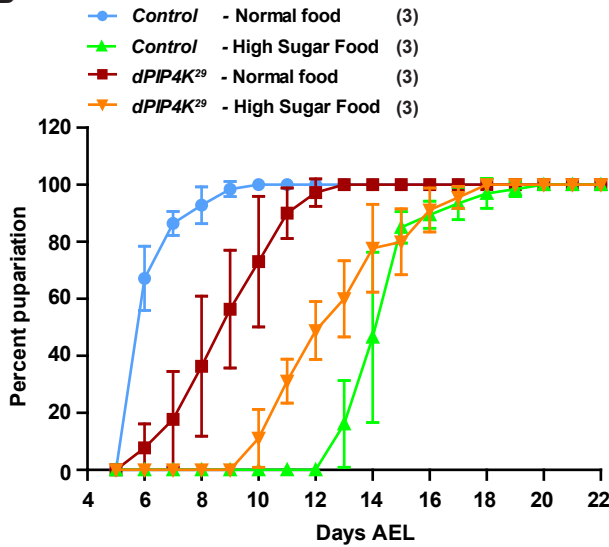

**C**

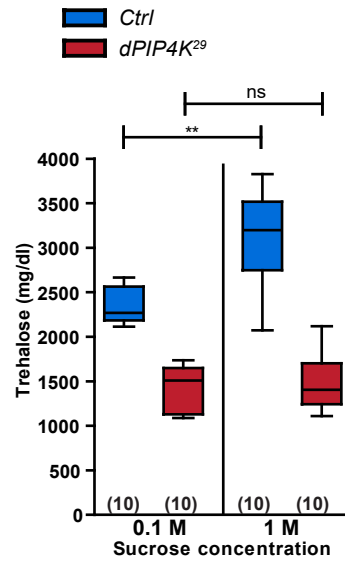

**D Comparison of larval growth on normal vs. high sugar diet : (Modified Shorter duration protocol used for experiments in Fig.5)**

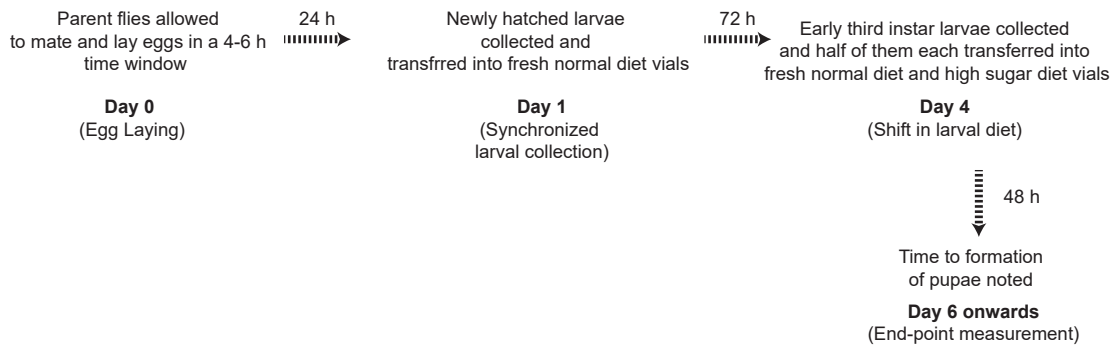

**Figure S6. Insulin resistance model in *Drosophila* larvae (Relate to Figure 5)**

**A.** Schematic depicting a longer protocol for induction of insulin resistance-like phenotype in *Drosophila* larvae using a high sugar diet. **B.** The graph represents the mean percentage of pupariation (After egg laying, AEL) observed over time on indicated diets. Data collected from 3 independent batches of about 12-25 larvae per batch (for *ROR* and *dPIP4K<sup>29</sup>*). Error bars indicate SD. **C.** Mean hemolymph trehalose levels measured of hemolymph pooled from 5-8 larvae each per genotype (*ROR* and *dPIP4K<sup>29</sup>*). Mann Whitney test used for statistical analysis of the distributions. \*\**p*-value < 0.01. **D.** A schematic depicting a short protocol for induction of insulin resistance-like phenotype in *Drosophila* larvae on a high sugar diet. Whiskers in the box plots represent minimum and maximum values, with a line at the median. Numbers inside the parentheses below the plots indicate the no. of biological replicates used for the measurement.
